# Supplementary material for: Fabrication of cross-linked fluorescent polymer nanoparticles and their cell imaging applications
Source: Royal Society of Chemistry journal article supplement (doi:10.1039/c4tc02672a), 2014-12-31
Supplement: c4tc02672a1.pdf [file c4tc02672a1.pdf]

### Electronic Supplementary Information (ESI)

## Fabrication of cross-linked fluorescent polymer nanoparticles and their cell imaging applications

Ke Wang,<sup>a</sup> Xiaoyong Zhang,<sup>a,b</sup> Xiqi Zhang,<sup>a</sup> Bin Yang,<sup>a</sup> Zhen Li,<sup>a</sup> Qingsong Zhang,<sup>a</sup>  
Zengfang Huang,<sup>a</sup> Yen Wei<sup>\*a</sup>

<sup>a</sup> Department of Chemistry and Key Laboratory of Bioorganic Phosphorus Chemistry & Chemical Biology (Ministry of Education), Tsinghua University, Beijing, 100084, China. E-mail: wangke007@iccas.ac.cn, weiyen@tsinghua.edu.cn; Fax: +86(10)6277-1149; Tel: +86(10)6277-2674

<sup>b</sup> Department of Chemistry/Institute of Polymers, Nanchang University, 999 Xuefu Avenue, Nanchang, 330031, China

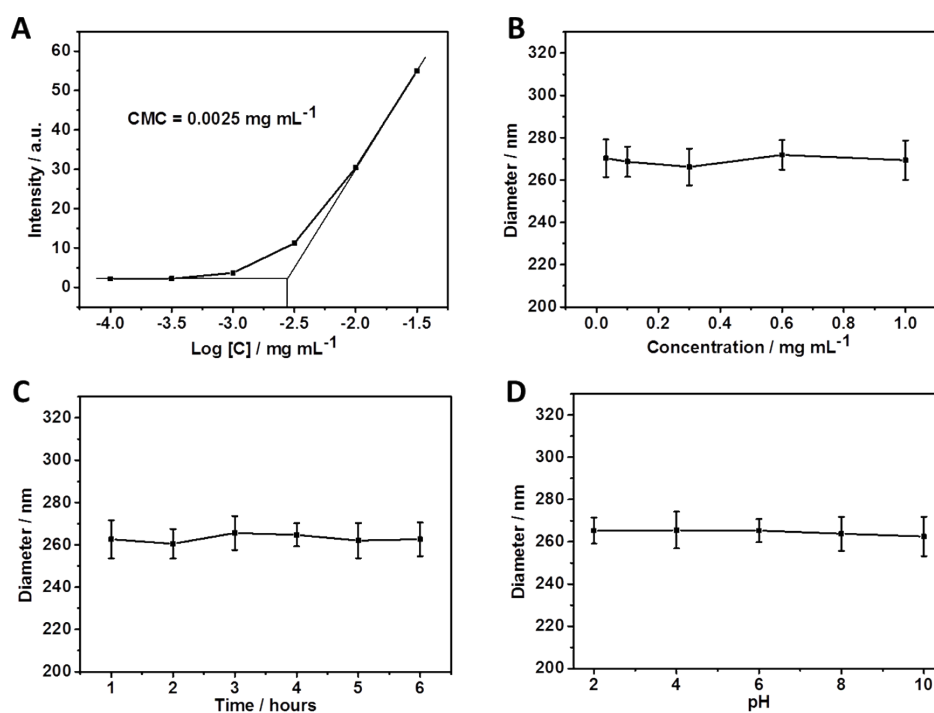

**Fig. S1** (A) Intensity of the aggregate emission vs. logarithm of the concentration of PhE-GM-PEI FPNs ( $\lambda_{ex} = 488$  nm and  $\lambda_{em} = 580$  nm); (B) Hydrodynamic size changes of PhE-GM-PEI FPNs at different concentrations incubated in PBS at 25 °C; (C) Hydrodynamic size changes of PhE-GM-PEI FPNs incubated in PBS (1 mg mL<sup>-1</sup>) at 25 °C for 6 hours; (D) Hydrodynamic size changes of PhE-GM-PEI FPNs incubated in PBS of different pH (1 mg mL<sup>-1</sup>) at 25 °C .

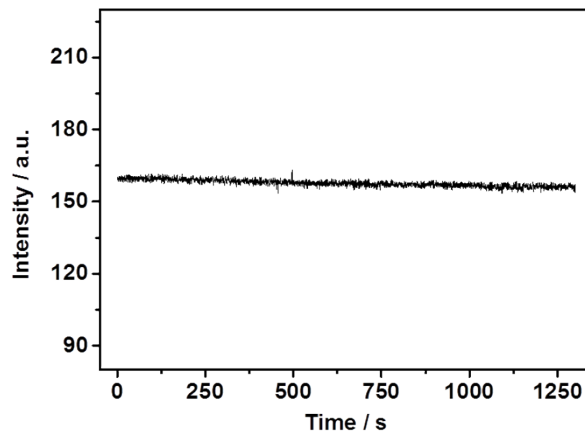

**Fig. S2** The fluorescence time traces of PhE-GM-PEI FPNs monitored at 580 nm ( $\lambda_{ex} = 488$  nm) for more than 20 min, suggesting the durable photostability of the PhE-GM-PEI FPNs.

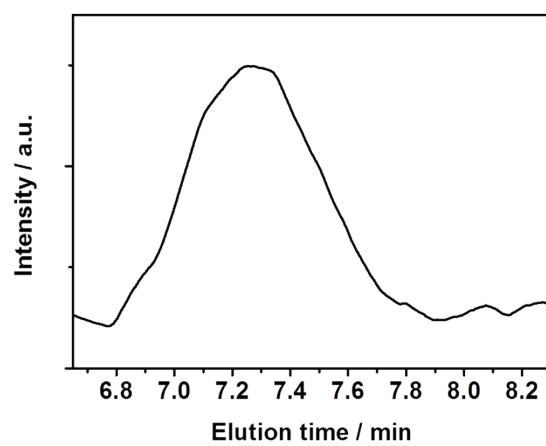

**Fig. S3** GPC chart of PhE-GM-PEI (eluent: DMF).
